# Supplementary material for: Enhancement of Vascularization and Ovarian Follicle Survival Using Stem Cells in Cryopreserved Ovarian Tissue Transplantation—A Systematic Review
Source: MDPI journal article supplement (doi:10.3390/biology13050342), 2024-05-14
Supplement: s1 [file s1]

**Table S1.** Data extraction form

| <b>Characteristics of the study</b>        |                                                                                                                |
|--------------------------------------------|----------------------------------------------------------------------------------------------------------------|
| authors                                    |                                                                                                                |
| year of publication                        |                                                                                                                |
| <b>Characteristics of study design</b>     |                                                                                                                |
| in vitro/in vivo                           |                                                                                                                |
| experimental groups                        |                                                                                                                |
| origin of ovarian tissue                   |                                                                                                                |
| number and age of tissue donors            |                                                                                                                |
| method of ovarian tissue cryopreservation  |                                                                                                                |
| size of ovarian tissue fragments           |                                                                                                                |
| type and origin of stem cells              |                                                                                                                |
| cell line passage number                   |                                                                                                                |
| ovarian tissue transplantation site        |                                                                                                                |
| recipient animal                           |                                                                                                                |
| type of in vitro culture; culturing medium |                                                                                                                |
| <b>Outcomes</b>                            |                                                                                                                |
| <b>Histological evaluation</b>             | tissue preparation and staining                                                                                |
|                                            | survival of ovarian follicles in total and survival of different stages of ovarian follicles; follicle density |
|                                            | tissue changes (e.g. fibrosis, hyalinization)                                                                  |
| <b>Immunohistochemistry</b>                | angiogenesis markers (e.g. CD34, CD31, VEGF)                                                                   |
|                                            | apoptosis markers (e.g. AC-3)                                                                                  |
|                                            | cellular proliferation markers (e.g. Ki67)                                                                     |
|                                            | oxidative stress markers (e.g. HIF1a, Nrf2, 8OHdG)                                                             |
| <b>TUNEL assay</b>                         | follicle apoptosis rate                                                                                        |
| <b>RT-PCR</b>                              | mRNA expression of genes coding for angiogenesis-related growth factors (e.g. VEGF, ANGPT2, IGF1, FGF2)        |
|                                            | mRNA expression of genes related to Wnt/ $\beta$ -catenin signaling pathway                                    |
|                                            | mRNA expression of genes related to oxidative stress                                                           |
| <b>Hormonal status</b>                     | concentration of hormones (E2, anti-Mullerian, progesterone, FSH)                                              |
|                                            | time of resumption of the menstrual cycle in rats/mice                                                         |
